# Supplementary material for: 3D Bioprinting Mesenchymal Stem Cell-Derived Neural Tissues Using a Fibrin-Based Bioink
Source: MDPI journal article supplement (doi:10.3390/biom11081250), 2021-08-21

## Supplemental Data

To determine the effects of LDN and SB in the differentiation of MSCs to DN, a 2D cell culture experiment was conducted where one group was treated with neurobasal media containing FGF8, FGFb, purmorphamine, B27, penicillin-streptomycin, GlutaMAX, and BDNF on day 9. Another group contained all the growth factors mentioned above, with the addition of 100 nM of LDN193189 and 10  $\mu$ M of SB431542. The control group contained neurobasal medium, B27, GlutaMAX, and penicillin/streptomycin. All groups were cultured for 12 days with no media changes.

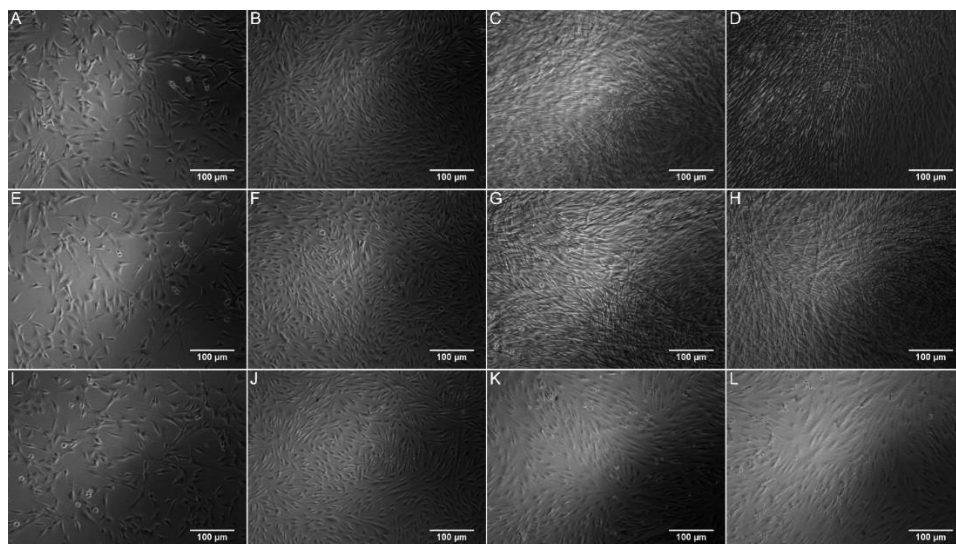

**Figure S1.** Phase contrast images of 2D cell culture experiment. (A–D) Group treated without LDN nor SB; (E–H) Group treated with LDN and SB. (I–L) Control group. Images were taken on day 1 (A,E,I) prior to treatment, day 4 (B,F,J), day 9 (C,G,K), and day 12 (D, H, and L).

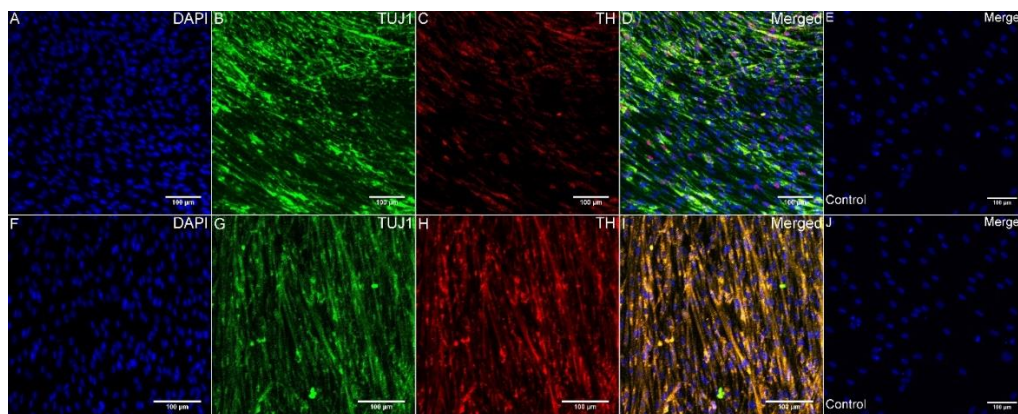

**Figure S2.** Immunocytochemistry of 2D cell culture. Group treated without LDN or SB (A–D), group treated with LDN and SB (E–I), and control group (E,J). All scale bars represent 100  $\mu$ m.

**Table S1.** Mean absorbance values ( $n = 3$ ) and concentrations for all standards, from which the standard curve graph was derived from. For all samples (bolded), the concentrations were interpolated from the standard curve graph.

| Standards and Samples | Mean Absorbance [nm] | Concentration [ng/mL] |
|-----------------------|----------------------|-----------------------|
| <b>Standard A</b>     | 1.804                | 0                     |
| <b>Standard B</b>     | 1.762                | 0.5                   |
| <b>Standard C</b>     | 1.634                | 1.5                   |

|                   |              |                |
|-------------------|--------------|----------------|
| <b>Standard D</b> | 1.373        | 5              |
| <b>Standard E</b> | 0.999        | 20             |
| <b>Standard F</b> | 0.609        | 80             |
| <b>2D Treated</b> | <b>1.836</b> |                |
| <b>2D Control</b> | <b>1.806</b> |                |
| <b>3D Treated</b> | <b>1.783</b> | <b>0.00547</b> |
| <b>3D Control</b> | <b>1.84</b>  |                |

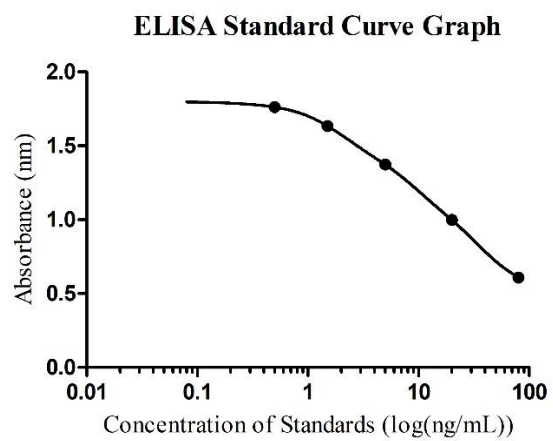

Supplement: s1 [file s1]
